# Supplementary material
Source: publisher figshare collection journal article supplement (https://gsapubs.figshare.com/ndownloader/files/26669576)
Supplement: Supplementary file 1 [file 26669576]

## Sheet: loadings
Supplementary Data 3. LDA loadings relative to chemospace and biplot in Fig. 1.
	Axis 1	Axis 2	Axis 3	Axis 4
Cu	-2.77	-0.85	-1.88	0.41
Zn	4.1	-3.22	2.08	-2.17
Fe	-1.68	1.062	2.15	0.77
Ca	0.77	1.17	-1	2.07

## Sheet: G48696
Rossi, V., Webb, S.M., and McNamara, M., 2021, Maturation experiments reveal bias in the chemistry of fossil melanosomes: Geology, v. 49, https://doi.org/10.1130/G48696.1
